# Supplementary material
Source: PubMed Central journal article supplement (PMC283592)
Supplement: pnas_100_24_14333__1.pdf [file pnas_100_24_14333__1.pdf]

**Table 1. Target sequences in the DEN-2 DNA used to PCR amplify viral genes**

| <b>Protein</b> | <b>Target 5' sequence</b> | <b>Target 3' sequence</b> |
|----------------|---------------------------|---------------------------|
| <b>C</b>       | ATGAATAACCAACGGAAAAA      | GATTCCAACAGTGATGGCG       |
| <b>PrM</b>     | TTGAATAGGAGACGCAGATC      | CTGTCACTCCTTCAATGACA      |
| <b>E</b>       | ACACATTTCCAAAGAGCCCTG     | TGGGAGTCATGGTGCAGGCC      |
| <b>NS1</b>     | TCACGCAGCACCTCACTGTC      | TCACTCCTTGGTCACAGCT       |
| <b>NS2A</b>    | GGACATGGGCAGGTCGACAAC     | CAAGAACCAGCAAGAAAAGG      |
| <b>NS2B</b>    | AGCTGGCCATTAAATGAGGC      | GGGAAGTGAAGAAAACAACGG     |
| <b>NS3</b>     | CCGGAGTATTGTGGGATGTTCC    | GAATTTGCAGCCGGAAGAAAG     |
| <b>NS4A</b>    | CTCTGACCCTGAACCTAAT       | TCCAGAACCTGAAAAACAGAGA    |
| <b>NS4B</b>    | ACACCCCAAGACAACCAACTGA    | ACACAACCAACACAAGAAGG      |
| <b>NS5</b>     | GGAACTGGCAACATAGGAGAG     | GAAGAAGCAGGAGTTCTGTGG     |

Sets of two primers were designed for the shown target 5' and 3' DNA sequences on the infectious clone PD2/IC-30P-A (DEN-2 16681, Thailand, 1996). PCR fragments were cloned with appropriate restriction sites in pCAGGS [3' hemagglutinin (HA)]. Start codons were inserted at the 5' ends of each gene, and 3' ends were fused in frame to the HA tag sequence encoded in the plasmid and ending on stop codons. Each cloned DEN-2 gene was sequenced to ensure accurate cloning.
